# Supplementary material for: De Novo Assembly of Two Swedish Genomes Reveals Missing Segments from the Human GRCh38 Reference and Improves Variant Calling of Population-Scale Sequencing Data
Source: MDPI journal article supplement (doi:10.3390/genes9100486), 2018-10-09
Supplement: s1 [file s1]

## Supplementary Figures

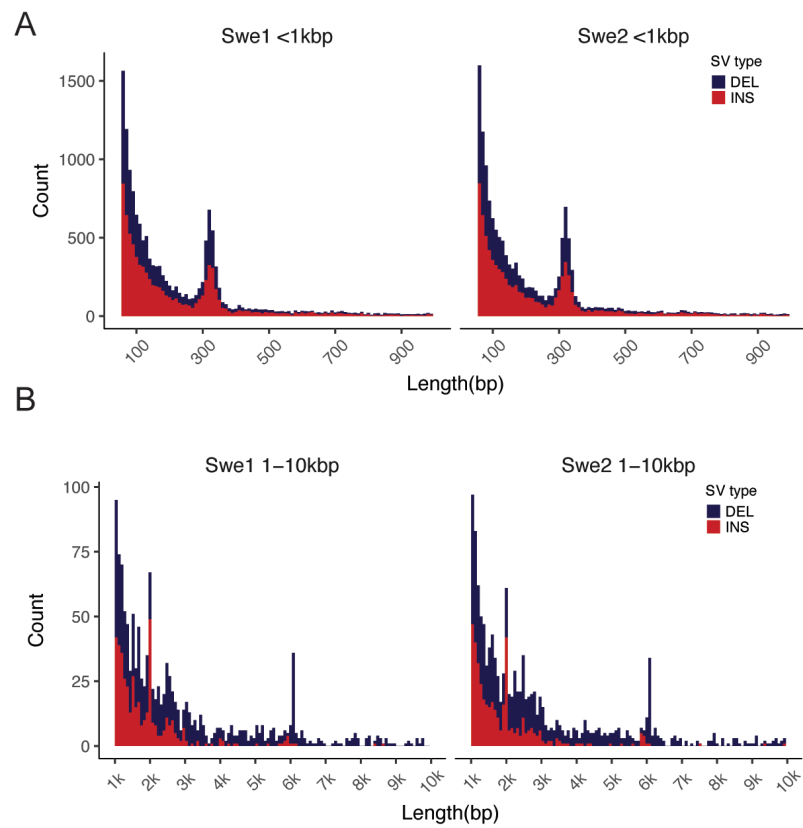

**Supplementary Figure S1.** Length distribution of structural variants detected in Swe1 and Swe2. **A)** Lengths of insertions (red) and deletions (blue) in Swe1 and Swe2 ranging from 50 bp to 1 kb. **A)** Lengths of insertions (red) and deletions (blue) in Swe1 and Swe2 ranging from 1 kb to 10 kb.

## Supplementary Tables

**Supplementary Table S1.** SMRT-sequencing data overview

|                                   | Swe1            | Swe2            |
|-----------------------------------|-----------------|-----------------|
| Number of bases                   | 236,280,502,022 | 233,518,501,004 |
| Number of reads                   | 19,676,492,492  | 20,319,577      |
| N50 Read Length                   | 16,764          | 15,922          |
| Mean Read Length                  | 12,008          | 11,492          |
| Fold genome coverage <sup>1</sup> | 78.76017        | 77.8395         |

<sup>1</sup>estimated for a human genome of size 3Gb

**Supplementary Table S2.** Results of FALCON *de novo* assembly

|                              | Swe1          | Swe2          |
|------------------------------|---------------|---------------|
| Total contigs                | 7,166         | 7,186         |
| Primary contigs <sup>1</sup> | 3,139         | 3,162         |
| Alternative contigs          | 4,027         | 4,024         |
| Total bases                  | 2,996,173,079 | 2,978,351,758 |
| Total bases, primary         | 2,879,740,782 | 2,865,049,726 |
| Total bases, alternative     | 116,432,297   | 113,302,032   |
| N50                          | 8,999,126     | 8,425,378     |
| N50, primary                 | 9,470,992     | 8,518,954     |
| N50, alternative             | 30,452        | 29,949        |

<sup>1</sup> 20kb cut-off was used for primary contigs

**Supplementary Table S3.** Overview of hybrid scaffolding of PacBio data using BioNano optical maps.

|      |                          | Total size  | N50       | Largest contig |
|------|--------------------------|-------------|-----------|----------------|
| Swe1 | BspQI                    | 3103,911 Mb | 22,893 Mb | 87,335 Mb      |
|      | BssSI                    | 3044,145 Mb | 26,076 Mb | 127,052 Mb     |
|      | BspQI+BssSI <sup>1</sup> | 3127,010 Mb | 49,799 Mb | 154,670 Mb     |
| Swe2 | BspQI                    | 3087,923 Mb | 22,914 Mb | 80,150 Mb      |
|      | BssSI                    | 3034,701 Mb | 26,507 Mb | 107,246 Mb     |
|      | BspQI+BssSI <sup>1</sup> | 3103,497 Mb | 45,443 Mb | 107,335 Mb     |

<sup>1</sup> A two-step hybrid scaffolding was performed using first BssSI and then BspQI BioNano optical maps.

**Supplementary Table S4.** Alignment results of PacBio data to hg38

|           | Swe1              |                           |               | Swe2              |                           |               |
|-----------|-------------------|---------------------------|---------------|-------------------|---------------------------|---------------|
|           | Contig            | Bases                     | Avg. Identity | Contig            | Bases                     | Avg. Identity |
| Aligned   | 6,812<br>(95.06%) | 2,970,533,201<br>(99.14%) | 99.75%        | 6,924<br>(96.35%) | 2,955,707,235<br>(99.24%) | 99.74%        |
| Unaligned | 354<br>(4.94%)    | 25,639,878<br>(0.86%)     | -             | 262<br>(3.65%)    | 22,644,523<br>(0.76%)     | -             |
| Total     | 7,166             | 2,996,173,079             | -             | 7,186             | 2,978,351,758             | -             |

**Supplementary Table S5.** Structural variation results for Swe1, Swe2 and HX1.

|       | Swe1  | Swe2  | HX1 50X |
|-------|-------|-------|---------|
| Type  | No.   | No.   | No.     |
| INS   | 9138  | 9035  | 7063    |
| DEL   | 7342  | 7274  | 6223    |
| DUP   | 1184  | 1081  | 782     |
| INV   | 272   | 297   | 194     |
| Total | 17936 | 17687 | 14262   |

**Supplementary Table S6.** Statistics for NS in Swe1 and Swe2

|                  | Swe1                  |            | Swe2                  |            |
|------------------|-----------------------|------------|-----------------------|------------|
|                  | Sequence<br>(>100 bp) | Base       | Sequence<br>(>100 bp) | Base       |
| 1R. mapping      | 3,847                 | 21,130,809 | 3,964                 | 18,478,945 |
| 2R. mapping      | 2,910                 | 13,861,611 | 2,824                 | 10,582,372 |
| RemoveDuplicates | 2,859                 | 13,826,351 | 2,786                 | 10,554,322 |

**Supplementary Table S7.** Repeat contents for NS is Swe1 and Swe2

|                | SWE1  |       |       |        |       | SWE2  |       |       |        |       |
|----------------|-------|-------|-------|--------|-------|-------|-------|-------|--------|-------|
|                | P ctg | A ctg | NS    | NS SWE | olp   | P ctg | A ctg | NS    | NS SWE | olp   |
| SINEs          | 13.22 | 12.71 | 2.27  |        | 1.69  | 13.25 | 12.88 | 2.11  |        | 1.99  |
| LINEs          | 21.31 | 19.61 | 0.72  |        | 0.33  | 21.33 | 19.69 | 1.00  |        | 0.53  |
| LTR            | 9.14  | 9.13  | 0.28  |        | 0.05  | 9.10  | 8.96  | 0.30  |        | 0.04  |
| DNA            | 3.68  | 3.24  | 0.05  |        | 0.01  | 3.69  | 3.19  | 0.05  |        | 0.01  |
| Unclassified   | 0.19  | 0.39  | 0.37  |        | 0.29  | 0.19  | 0.39  | 0.45  |        | 0.26  |
| Satellites     | 1.69  | 2.47  | 42.08 |        | 49.37 | 1.59  | 2.61  | 37.93 |        | 39.01 |
| Simple repeats | 1.61  | 2.71  | 42.08 |        | 38.37 | 1.55  | 2.52  | 41.20 |        | 44.87 |
| Low complexity | 0.22  | 0.31  | 0.73  |        | 0.05  | 0.21  | 0.28  | 0.56  |        | 0.03  |
| Base masked    | 51.08 | 50.62 | 88.58 |        | 90.17 | 50.96 | 50.57 | 83.60 |        | 86.74 |

**Supplementary Table S8.** GC contents for NS is Swe1 and Swe2

|                   | SWE1  | SWE2  |
|-------------------|-------|-------|
| Assembly (P20k+A) | 40.95 | 40.95 |
| P_ctg             | 40.88 | 40.89 |
| A_ctg             | 42.67 | 42.51 |
| NS                | 42.68 | 43.45 |
| NS_SWE_overlap    | 44.34 | 43.97 |

**Supplementary Table S9.** BLAST results for NS

|                           | Swe1     |            | Swe2     |            |
|---------------------------|----------|------------|----------|------------|
|                           | Sequence | Bases      | Sequence | Bases      |
| <b>Eukaryota</b>          | 1,981    | 13,295,261 | 1,901    | 10,012,843 |
| Human                     | 1,759    | 11,414,508 | 1,736    | 9,332,030  |
| Non-human primates        | 194      | 1,841,769  | 127      | 542,673    |
| Mouse                     | 8        | 11,884     | 8        | 10,486     |
| Other                     | 20       | 25,639     | 30       | 127,654    |
| <b>N/A</b>                | 3        | 1,461      | 1        | 494        |
| <b>Viruses</b>            | -        | -          | 2        | 24,453     |
| <b>No hit<sup>1</sup></b> | 875      | 531,090    | 882      | 516,532    |
| <b>Total</b>              | 2,859    | 13,826,351 | 2,786    | 10,554,322 |

<sup>1</sup> No hit includes sequences that fail to meet the 1e-50 E-value threshold.

**Supplementary Table S10.** Overlap of NS between Swe1, Swe2 and HX1

|                    | Swe1     |            | Swe2     |            |
|--------------------|----------|------------|----------|------------|
|                    | Sequence | Bases      | Sequence | Bases      |
| <b>Shared</b>      | 678      | 10,553,888 | 491      | 7,330,339  |
| with the other Swe | 222      | 1,544,445  | 220      | 1,525,284  |
| with HX1           | 113      | 1,361,359  | 44       | 294,295    |
| with all           | 343      | 7,648,084  | 227      | 5,510,760  |
| <b>Unique</b>      | 2,181    | 3,272,463  | 2,295    | 3,223,983  |
| <b>Total</b>       | 2,859    | 13,826,351 | 2,786    | 10,554,322 |

**Supplementary Table S11.** Amount of NSs that could be anchored to hg38

|                       | Swe1    | Swe2    |
|-----------------------|---------|---------|
| <b>Anchored</b>       |         |         |
| To chr1-Y (incl. alt) | 2075276 | 1972219 |
| To unlocalized chr    | 447961  | 443360  |
| To unplaced scaffold  | 406988  | 280482  |
| To multiple           | 1703183 | 1553413 |
| To decoy              | 597290  | 732234  |

Decoy: EBV, bait sequences to sink reads; might be skipped

Unlocalized: sequences that are associated with a specific chr but haven't succeeded in placing on the chr (orientation and order)

Unplaced: sequences in an assembly but still cannot be associated with any chromosome

## Supplementary Information

### Falcon configuration file used to generate Swe1 and Swe2 assemblies

```
[General]
input_fofn = input.fofn
input_type = raw

length_cutoff = 8000
length_cutoff_pr = 8000

pa_HPCdaligner_option = -v -dal128 -t16 -e.70 -l1000 -s1000 -M28
ovlp_HPCdaligner_option = -v -dal128 -t32 -h60 -e.96 -l500 -s1000 -M28

pa_DBsplit_option = -x500 -s400
ovlp_DBsplit_option = -x500 -s400

falcon_sense_option = --output_multi --min_idt 0.70 --min_cov 4 --max_n_read
200 --n_core 8

overlap_filtering_setting = --max_diff 100 --max_cov 100 --min_cov 1 --bestn
10 --n_core 8
```
